1  
2  
3  
4  
5  
6  
7  
8  
9  
10  
11  
12  
13  
14  
15  
16  
17  
18  
19  
20  
21  
22  
23  
24  
25  
26  
27  
28  
29  
30  
31  
32  
33  
34  
35  
36  
37  
38  
39  
40  
41  
42  
43  
44  
45

**Title: Regions of visual cortex responding to tactile stimulation in an individual with longstanding low vision are not causally involved in tactile processing performance**

**Authors:** Edward H. Silson<sup>1,2</sup>, Andre D. Gouws<sup>3</sup>, Gordon E. Legge<sup>4</sup> & Antony B. Morland<sup>2,3</sup>

**Affiliations**

1. Department of Psychology, School of Philosophy, Psychology and Language Sciences, The University of Edinburgh, Edinburgh, UK, EH8, 9JZ (current affiliation).
2. Department of Psychology, University of York, Heslington, YO10 5DD, UK
3. York NeuroImaging Centre, The Biocentre, York Science Park, Heslington, YO10 5NY, UK
4. Department of Psychology, University of Minnesota, Minneapolis, MN, USA

**Acknowledgements**

'S' is author G.E.L.

**Abstract**

Braille reading and other tactile discrimination tasks recruit the visual cortex of both blind and normally sighted individuals undergoing short-term visual deprivation. Prior functional magnetic resonance imaging (fMRI) work in patient 'S', a visually impaired adult with the rare ability to read both highly magnified print visually and Braille by touch, found that foveal representations of S's visual cortex were recruited during tactile perception, whereas peripheral regions were recruited during visual perception. Here, we test the causal nature of tactile responses in the visual cortex of S by combining tactile and visual psychophysics with repetitive transcranial magnetic stimulation (rTMS). First, we replicate this prior fMRI work in S. Second, we demonstrate that transient disruption of S's foveal visual cortex has no measurable impact on S's tactile processing performance compared to that of healthy controls – a pattern not predicted by the fMRI results. Third, stimulation of foveal visual cortex maximally disrupted visual processing performance in both S and controls, suggesting the possibility of preserved visual function within S's foveal cortex. Finally, stimulation of somatosensory cortex induced the expected disruption to tactile processing performance in both S and controls. These data suggest that tactile responses in S's foveal representation reflect unmasking of latent connections between visual and somatosensory cortices and not behaviourally relevant cross-modal plasticity. Unlike studies in congenitally blind individuals, it is possible that the absence of complete visual loss in S has limited the degree of causally impactful cross-modal reorganisation.

**Significance statement**

Prior fMRI work in patient 'S' identified that foveal portions of S's visual cortex respond more to tactile processing, whereas peripheral portions respond more to visual processing. Here, we tested whether this foveal processing was causally related to either tactile or visual processing. First, using fMRI we replicate prior work. Second, we demonstrate that TMS of the foveal representation and of somatosensory cortex interfered with visual and tactile discriminations respectively in controls and crucially also in S. The foveal representation in S, which is responsive

46 to tactile stimulation, does not however play a causal role in mediating S's ability to discriminate  
47 Braille characters and likely reflects the unmasking of latent connections between visual and  
48 somatosensory cortices.

49

## 50 **Introduction**

51 Whether or not human visual cortex reorganises functionally following deprived visual input is a  
52 crucial question in visual neuroscience (Baseler et al., 2011; Cheung et al., 2009; Haak et al.,  
53 2015; Sadato et al., 1996). In blind individuals, fMRI studies highlight visual cortex activity during  
54 somatosensory tasks (Burton et al., 2002; Sadato et al., 1996) (e.g. Braille reading) and short-  
55 term visual deprivation can lead to increased recruitment of visual cortex during somatosensory  
56 tasks in normally sighted individuals (Kauffman et al., 2002; Merabet et al., 2007, 2008). Further,  
57 somatosensory and auditory task-related activity has been reported in the lesion-projection-zone  
58 (LPZ) of patients with macular degeneration (Masuda et al., 2021). Collectively, these fMRI data  
59 suggest that some form of cross-modal plasticity is possible in visual cortex.

60 Whilst transient disruption of visual cortex via TMS impairs Braille reading performance in blind  
61 individuals (Cohen et al., 1997), its detrimental impact appears to depend on the onset of  
62 blindness, with little impact on Braille reading performance of individuals whose blindness occurs  
63 after ~14 years of age (Cohen et al., 1997, 1999). Thus, despite considerable fMRI evidence  
64 suggesting visual cortex is capable of cross-modal plasticity, whether or not such activity is  
65 causally related to cross-modal performance is less clear and may depend on plasticity of the  
66 brain that is only present early in life.

67

68 Prior fMRI work (Cheung et al., 2009), capitalized on the rare case of 'patient S', who despite  
69 being visually impaired, is capable of both reading print visually and Braille by touch. In S, tactile  
70 processing (e.g. Braille reading) selectively recruited the foveal representation of visual cortex  
71 whereas visual processing (e.g. viewing letter strings) recruited more peripheral portions. There  
72 was no evidence of central-visual field loss in S, despite the loss of visual responses in the foveal  
73 representation. The fact that the foveal representation was recruited during Braille reading in S  
74 was interpreted as reflecting retinotopically specific cross-modal plasticity. Although it was argued  
75 that in S, such reorganisation was optimal - since only those parts of visual cortex that were not  
76 critical for S's remaining low-vision were recruited during somatosensory processing - whether or  
77 not this somatosensory activity plays a causal role in S's tactile processing ability is unclear.

78

79 Here, we tested this prediction directly in S by pairing both tactile and visual psychophysics with  
80 rTMS of the foveal representation of visual cortex (occipital pole [OP]), somatosensory cortex (S1)  
81 and an occipital lobe control region (OC). First, our fMRI experiment replicated prior work in S by  
82 demonstrating preferential recruitment of the foveal and peripheral representations of visual  
83 cortex during tactile and visual stimulation, respectively (Cheung et al., 2009). Second, we report  
84 that despite the pattern of fMRI data in S, transient disruption of OP via repetitive TMS (rTMS)  
85 does not alter tactile performance beyond that observed in normally sighted controls. The  
86 somatosensory-related activity within the foveal representation of visual cortex of S likely reflects  
87 unmasked latent connections with somatosensory cortex rather than reflecting causally relevant  
88 cross-modal reorganisation.

89

## 90 **Methods**

91

### 92 **Participants**

93 We report fMRI and behavioural measurements from 1 participant with 'low-vision' (Patient S; see  
94 **Case Description**) and three control participants with normal vision (C1-3; 2 male and 1 female;  
95 ages 21-35. Recruitment of low-vision patients who can still read visual print and are also expert  
96 Braille readers for basic research is difficult. Prior work, on which this study is based, published  
97 in *Current Biology*, focused on a case study of Patient S and compared fMRI response in S to  
98 those of 4 healthy controls. In the current case study of S, we have therefore adopted methods  
99 that enable us to perform measurements of single participants. All procedures adhered to  
100 protocols based upon the declaration of Helsinki ethical principles for research involving human  
101 participants. The ethics committees at the York Neuroimaging Centre and the Department of  
102 Psychology at the University of York approved these experiments. All participants provided written  
103 informed consent to participate in the experiment.

104

### 105 **MR Tactile and visual stimuli**

106 Tactile stimuli in the form of Braille letters [(a, l, q or x)] were delivered via piezoelectric stimulator  
107 (max amplitude, 300ms). Eight presentations occurred during each 12s block. Visual stimuli  
108 consisted of 100% contrast reversing ring patterns (radial frequency 0.16 cycles per degree,  
109 reversal rate 6Hz). Ring stimuli extended to 15deg eccentricity. Each run consisted of 10 cycles  
110 of 12s on 12s off stimulation using an interleaved paradigm (Visual, rest, Tactile, rest).

111

### 112 **Scanning Procedure**

113 All MRI data were acquired on a 3.0 Tesla GE Sigma HD Excite scanner. For structural data, two  
114 multi-average, whole-head T1-weighted anatomical volumes were acquired for each subject  
115 (repetition time = 7.8 ms, echo time = 3 ms, TI = 450 ms, field of view = 290 × 290 × 176, 256 ×  
116 256 × 176 matrix, flip angle = 20°, 1.13 × 1.13 × 1.0 mm<sup>3</sup>). For functional data, gradient recalled  
117 echo pulse sequences were used to measure T2\* blood oxygen level-dependent data (repetition  
118 time = 2,000 ms, echo time = 30 ms, field of view = 192 cm, 64 × 64 matrix, 39 contiguous slices  
119 with 3-mm thickness). Images were read-out using an echo planar imaging (EPI) sequence.  
120 Magnetization was allowed to reach a steady state by discarding the first five volumes.

121

### 122 **fMRI Data Analysis and Visualisation**

123 All anatomical and functional data were pre-processed and analysed using the Analysis of  
124 Functional NeuroImages (AFNI) software (Cox, 1996) (RRID: [SCR\\_005927](https://www.ncbi.nlm.nih.gov/rrids/SCR_005927)). All images were  
125 motion-corrected to the first volume of the first run (using the AFNI function *3dVolreg*). Following  
126 motion correction, images were detrended (*3dDetrend*) and spatially smoothed (*3dmerge*) with a  
127 3mm full-width-half-maximum smoothing kernel. Signal amplitudes were then converted into  
128 percent signal change (*3dTstat*). To analyse the functional data, we employed a general linear  
129 model implemented in AFNI (*3dDeconvolve*, *3dREMLfit*). The data at each time point were treated  
130 as the sum of all effects thought to be present at that time and the time-series was compared  
131 against a Generalized Least Squares (GSLQ) model fit with REML estimation of the temporal  
132 auto-correlation structure. Responses were modelled by convolving a standard gamma function  
133 with a 12s square wave for each stimulus block (Visual, Tactile). Estimated motion parameters

134 were included as additional regressors of no-interest and fourth-order polynomials were included  
135 to account for slow drifts in the MR signal over time. To derive the response magnitude per  
136 condition, *t*-tests were performed between the condition-specific beta estimates and baseline. The  
137 corresponding statistical parametric maps were aligned to the T1 obtained within the same  
138 session by calculating an affine transformation (*3dAllineate*) between the motion-corrected EPIs  
139 and the anatomical image and applying the resulting transformation matrices to the T1. In each  
140 participant, the pre-processed functional data were projected onto surface reconstructions  
141 (*3dvol2surf*) of each individual participant's hemispheres derived from the Freesurfer4 autorecon  
142 script (<http://surfer.nmr.mgh.harvard.edu/>) using the Surface Mapping with AFNI (SUMA)  
143 software (Saad & Reynolds, 2012).

144

#### 145 **TMS target localisation**

146 TMS target locations were defined in each participant individually. The occipital pole [OP] target  
147 was defined according to the T1-weighted anatomical scan. The occipital control [OC] target was  
148 defined as a fixed distance (~1cm) dorsal and anterior of that participants' OP target. Our team  
149 has employed a similar approach previously in order to define close proximity control locations  
150 relative to our primary target sites (Silson et al., 2013; Strong et al., 2017). The S1 target site was  
151 defined as the voxel showing the largest response to tactile stimulation within the appropriate  
152 portion of the somatosensory cortex.

153

#### 154 **Psychophysical tasks and stimuli**

155 Tactile and visual thresholds were established in each individual participant prior to TMS  
156 sessions. Note that due to S's low-vision the size of the visual stimuli differed from controls.

157 **Tactile threshold:** Braille letters (a, l, q or x) were delivered via piezoelectric stimulator. Each  
158 stimulus comprised all 6 pins, which were raised to a minimum pedestal level of 2250 (max  
159 available 4095) units. All pins were raised for 100ms, before a subset of these 6 pins were further  
160 raised to represent the Braille letter. Participants had to detect the target letter as the pins raised  
161 above the background 'noise'. Using a 4AFC paradigm with a 1 up 2 down staircase, the  
162 maximum pin displacement was reduced while the noise pin amplitude was held constant to  
163 establish a 71% correct threshold for letter detection. **Visual threshold:** Maximum luminance  
164 visual letters (white, A, L, Q or X) were presented on a black background (15 degrees for S, 4  
165 degrees for controls). Using a 4AFC paradigm with a 1 up 2 down staircase, the background  
166 luminance was increased while the letter luminance was held constant to establish a 71% correct  
167 threshold for letter detection.

168

#### 169 **TMS Protocol.**

170 A train of four biphasic (equal relative amplitude) TMS pulses, separated by 50 ms (20 Hz) at 70%  
171 of the maximum stimulator output (2.6 T) were applied to the participants' scalp using a figure-of-  
172 eight coil (50-mm external diameter of each ring) connected to a Magstim Rapid2 stimulator  
173 (Magstim). Participants were seated in a purpose-built chair with chin rest and forehead support.  
174 The coil was secured mechanically and placed directly above each cortical target (occipital pole  
175 [OP], occipital control [OC], somatosensory cortex [S1]) with the handle oriented parallel with the  
176 floor. The position of the coil was monitored and tracked in real time allowing the displacement  
177 between the intended and actual site of rTMS delivery to be measured. Each participant

178 underwent eight sessions (2 tasks × (3 TMS sites + 1 no TMS)). Each TMS session contained 35  
179 trials (5 training). Stimuli (both Tactile and Visual) were presented according to each participants'  
180 specific threshold. rTMS pulses were delivered concurrently with the presentation of the test  
181 stimulus. This temporal configuration was identical to that used in previous studies from our  
182 laboratory where induced functional deficits were found to be maximized when rTMS was  
183 delivered coincident with the stimulus onset.

184

### 185 **Resampling of rTMS data**

186 Our study lacked the power to compare S' behavioural performance to the average of the controls  
187 as is commonplace. Instead, we adopted a bootstrapping and resampling procedure to  
188 demonstrate that the impact of OP stimulation in S was not different from an expected distribution  
189 of controls. For each control and session, we randomly sampled 80% of the experimental data  
190 (24/30 trials) and calculated the percentage of correct responses. This procedure was then  
191 repeated 10,000 times before averaging these values across control participants. Distributions of  
192 the difference between conditions (e.g. S1 - OP tactile performance) were then created and  
193 compared with the same calculation in S.

194

### 195 **Subjective observations from S**

196 We acquired subjective reports from S following rTMS sessions. Following S1 stimulation during  
197 tactile processing S reported that “all pins felt the same”, “Jaw reflex was a little distracting”. S did  
198 not report experiencing any tingling (i.e. tactile phosphenes) following S1 stimulation. Following  
199 OC stimulation during tactile processing, S reported that “it was a little easier than before (S1),  
200 but not great”. Following OP stimulation during tactile processing S reported that “That was easier  
201 than before (OC)”.

202

## 203 **Results**

204

### 205 **Foveal recruitment during somatosensory processing**

206 First, blood-oxygen-level-dependent (BOLD) fMRI was employed to localise tactile and visual  
207 responses in S and three normally sighted controls (C1-C3). **Figure 1**, shows the contrast of  
208 Visual *versus* Tactile overlaid onto surface reconstructions of both hemispheres for S (**Figure 1A**)  
209 and a representative control (C2, **Figure 1B**). In S, tactile responses are evident at the occipital  
210 pole in both hemispheres and throughout somatosensory cortex, whereas visual responses are  
211 restricted to more anterior portions of visual cortex that represent the periphery (Wandell et al.,  
212 2007). No such somatosensory related activity was observed in the visual cortex of C2. Indeed,  
213 visual and tactile responses were restricted to visual and somatosensory cortices, respectively -  
214 a pattern replicated in C1 and C3 (**Figure 1C**).

215

216 To confirm the replication of prior work (Cheung et al., 2009), three contiguous regions of interest  
217 (ROIs) were defined that divided primary visual cortex (V1) into foveal (< 4 deg eccentricity),  
218 parafoveal (> 4 < 8 deg) and peripheral (> 8deg) portions using eccentricity data from an  
219 independent group-average dataset derived from 29 healthy volunteers. **Figure 1D** shows the  
220 median response (given by the t-value for Visual *versus* Tactile) within each ROI for S and all  
221 three controls. In S, foveal responses are negative, reflecting tactile recruitment with both



222 parafoveal and peripheral responses becoming increasingly positive (visual recruitment). In  
223 contrast, all three controls show positive responses, reflecting visual recruitment in all ROIs that  
224 increase in magnitude with increasing eccentricity.

225

### 226 **TMS target locations**

227 **Figure 2A** shows the three TMS target locations in S, overlaid onto posterior and lateral partially  
228 inflated surface reconstructions of the right hemisphere, along with the contrast of Visual *versus*  
229 Tactile. The OP target site (black dot), which was defined according to the T1-weighted  
230 anatomical scan, can be seen to overlap the tactile responses (at the selected statistical  
231 threshold). The OC target (green dot) was defined as a fixed distance (~1cm) dorsal and anterior  
232 of our OP target. Our team has employed a similar approach previously in order to define close  
233 proximity control locations relative to our primary target sites (Silson et al., 2013; Strong et al.,  
234 2017) . The S1 target site (yellow dot) was defined as the voxel showing the largest response to  
235 tactile processing.

236

237 To confirm that our anatomical OP target was within tactile responding cortex in S, we defined a  
238 region-of-interest (ROI) around the OP target site (500 vertices) and calculated the mean  
239 response from this ROI across all 10 tactile and visual fMRI blocks. **Figure 2B** shows the mean  
240 response (plus s.e.m) and highlights the preferential recruitment of this region during tactile  
241 processing in S. **Figure 2C** shows the median response (t-value) from this OP ROI for both S and  
242 all three controls. Whereas in S, a negative response is observed, reflecting tactile recruitment,  
243 the opposite pattern is observed in each control. Thus, the pattern of fMRI responses not only  
244 confirm prior work in S (Cheung et al., 2009), but also, highlight that responses in the foveal cortex  
245 of S are the opposite to those observed in normally sighted controls.

246

247

248

249

250

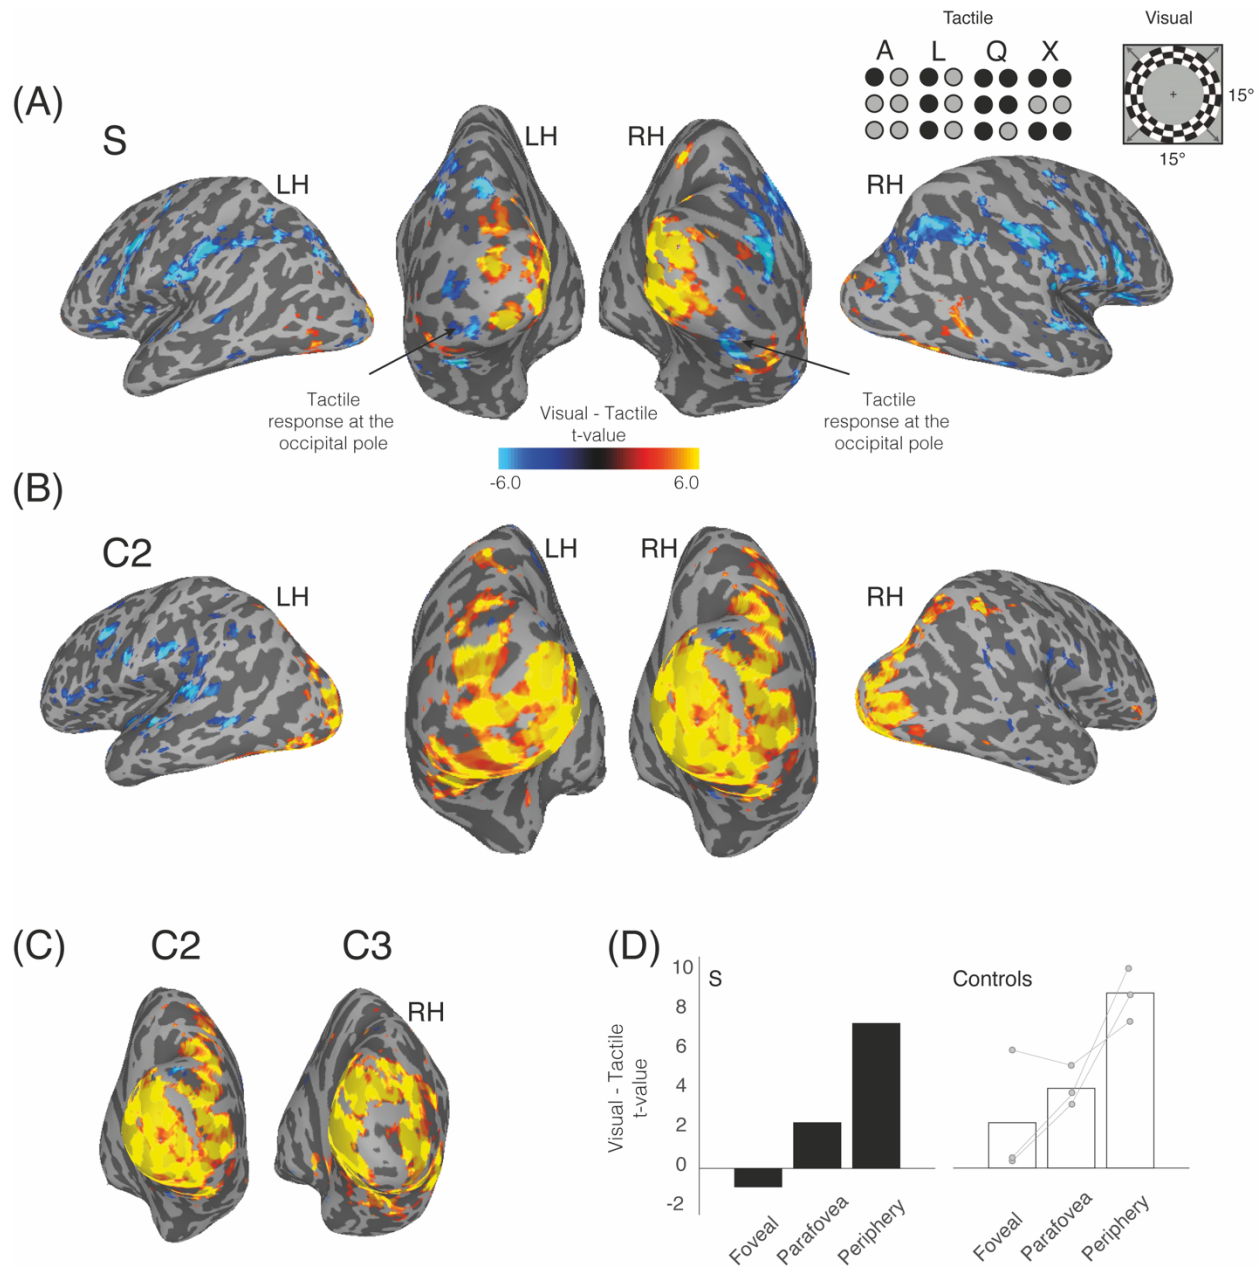

251  
252  
253  
254  
255  
256  
257  
258  
259  
260  
261  
262

**Figure 1. Tactile responses in foveal cortex of S.**

(A) Tactile and visual stimuli presented during fMRI are displayed inset. The contrast of Visual - Tactile is overlaid onto lateral and posterior partially inflated surface reconstructions of both hemispheres in S (LH=left hemisphere, RH=right hemisphere). Hot-colours represent visually evoked responses, cold-colours represent tactile evoked responses ( $p < 0.0001$ , uncorrected). Tactile responses are evident at the occipital pole in both hemispheres. (B) Same as (A) but for a representative control (C2). No tactile responses are evident within visual cortex. (C) The contrast of Visual - Tactile is overlaid onto posterior views of the right hemisphere in the additional control participants (C1, C3). No tactile responses are evident at the occipital pole or within visual cortex. (D) Bars represent the mean response (t-value) within foveal, parafoveal and peripheral portions of early visual cortex in S (black bars) and the average of controls (white bars). Individual data points are plotted and linked for each control. Negative values represent larger

263 responses during tactile processing, positive values represent larger responses during visual processing.  
264 In S, foveal cortex responds more to tactile over visual processing with the opposite pattern evident in  
265 parafoveal and peripheral portions. In controls, all portions show the anticipated larger responses during  
266 visual processing.

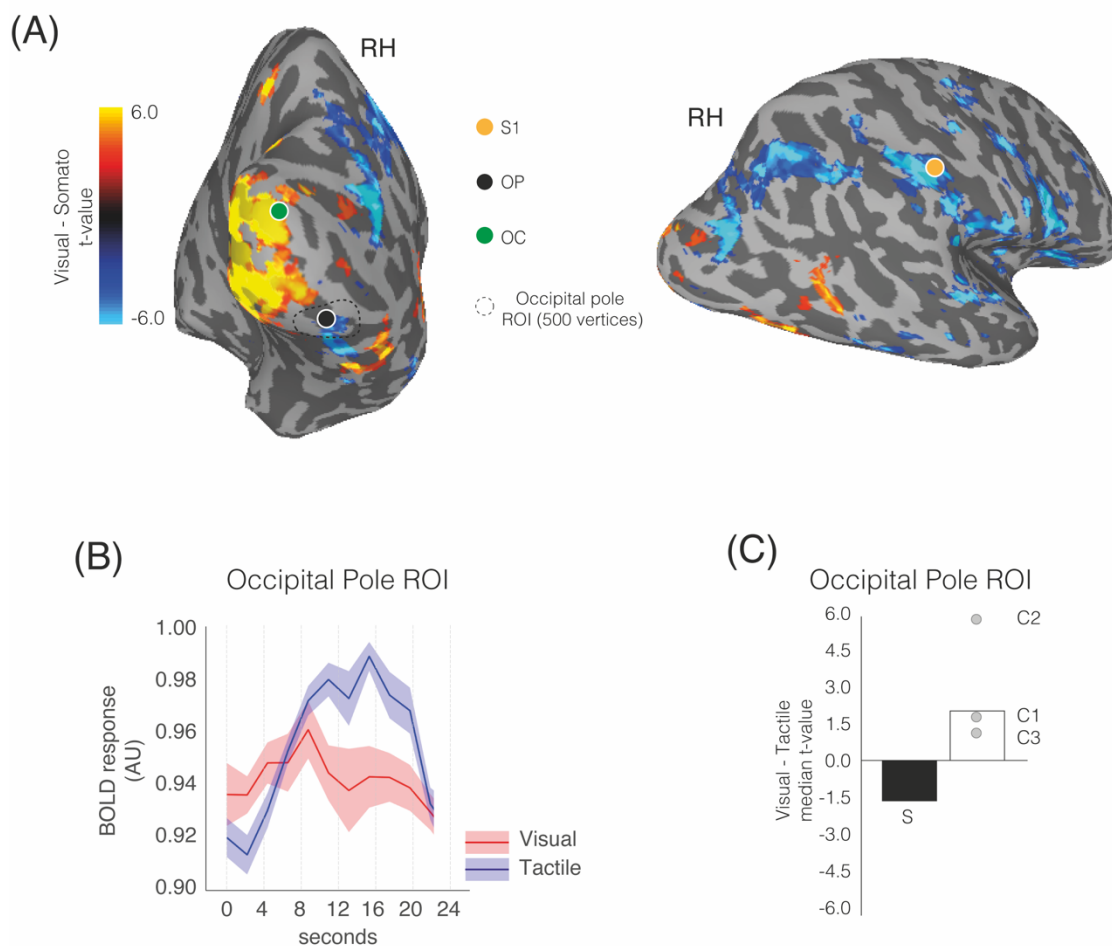

267 **Figure 2. TMS target sites in S and fMRI responses from the occipital pole.**

268 (A) Posterior and lateral views of the right hemisphere of S are shown with the contrast of Visual - Tactile  
269 overlaid ( $p < 0.0001$ , uncorrected). The occipital pole [OP] target site (black dot) can be seen to overlap  
270 tactile responses. The occipital control [OC] target site (green dot) is located dorsal and anterior of the OP.  
271 The somatosensory [S1] target site (yellow dot) can be seen to overlap tactile responses within the hand-  
272 representation of somatosensory cortex. The OP ROI encompassing the OP target site is shown by the  
273 black outline. (B) Lines represent the mean (plus s.e.m) response within the occipital pole ROI across all  
274 tactile (blue-line) and visual (red-line) fMRI blocks in S. The OP ROI selectively responds to tactile over  
275 visual processing. (C) Bars represent the mean response within the OP ROI in S (black bar) and the  
276 average of controls (white bars). Individual data points are plotted and labelled for each control. Whereas  
277 in S, the OP ROI shows a negative response reflecting selective recruitment during tactile processing, all  
278 three controls show the opposite pattern, reflecting the expected selective recruitment during visual  
279 processing.

280  
281  
282



283 **rTMS of OP has no measurable impact on tactile processing performance in S**

284 **Figure 3A** shows tactile performance in S and controls for all four conditions. These data reveal  
285 a strikingly similar pattern of performance across TMS conditions in S and controls - not predicted  
286 on the basis of the fMRI data. In S, tactile performance was maximally impaired (relative to noTMS  
287 baseline) following rTMS of S1 and to a lesser extent OC. Critically however, rTMS of OP had  
288 little to no detrimental impact on S's tactile performance compared to the no TMS condition. On  
289 average controls showed a largely similar pattern with tactile performance maximally impaired  
290 following S1 stimulation but no clear detrimental impact of either OP or OC stimulation.  
291 Bootstrapping analyses indicate the impact of OP relative to S1 stimulation on tactile performance  
292 in S fell within the expected distribution of results in controls (**Figure 3B**). Similarly, the impairment  
293 in tactile processing induced by TMS of S1 in S relative to noTMS baseline was of a similar  
294 magnitude to what could be expected from controls (**Figure 3C**).  
295

296 **Impact of TMS on visual processing performance in S and controls**

297 **Figure 3D** shows visual performance in S and controls for all four conditions. In S, visual  
298 performance was impaired slightly (relative to noTMS baseline) following rTMS of both OP and  
299 OC, but not S1 (which caused a slight increase in performance). In controls, performance was  
300 severely impaired following OP stimulation with much smaller decreases following stimulation of  
301 OC and S1, respectively - as was predicted for foveally presented small letter stimuli.  
302 Bootstrapping analyses indicate that the effect of OP stimulation on S's visual performance is  
303 smaller than what could be expected compared to both stimulation of OC (**Figure 3E**) and the  
304 noTMS baseline (**Figure 3F**). The differential impact of OP stimulation on visual performance  
305 between S and controls likely reflects the fact that in S visual stimuli were required to be very  
306 large (~15 deg) extending much further into the periphery, whereas the targeted OP region  
307 represents foveal visual field positions.  
308  
309  
310  
311  
312  
313  
314  
315  
316  
317  
318  
319  
320  
321  
322  
323  
324  
325  
326



347 linked for each control. Unlike tactile performance, the pattern of results is more varied between S and  
348 controls. In both, performance is maximally disrupted (relative to noTMS baseline) following TMS of OP,  
349 but the magnitude of this disruption is larger for controls than for S. In S, rTMS of S1 caused an increase  
350 in performance, but had little to no impact in controls. **(G)** Distribution represents the bootstrapped  
351 difference in performance between TMS of OP - OC in controls (negative values represent a larger drop in  
352 performance following rTMS of OP). The red-dashed line indicates the same difference in S. The difference  
353 observed in S falls beyond that expected in controls. **(H)** Same as (G) but for OP - noTMS baseline. Again,  
354 the result in S falls outside that expected from controls.

355

## 356 Discussion

357 Our measurements suggest that the somatosensory related activity within the foveal  
358 representation of visual cortex of S plays little to no causal role in S's tactile processing  
359 performance, and more likely reflects unmasking of latent connections between the  
360 somatosensory and visual cortices that are typically suppressed in normally sighted individuals  
361 (Masuda et al., 2021).

362

363 The pattern of TMS results in S during Braille reading were largely indistinguishable from those  
364 of the control participants, with stimulation of S1 inducing the largest detrimental impact to  
365 somatosensory processing. Critically, OP stimulation in S did not induce the reduction in tactile  
366 performance predicted on the basis of the fMRI experiments conducted here and in prior work  
367 (Cheung et al., 2009). That the foveal confluence of S preferentially responds to tactile over visual  
368 information was confirmed and yet the TMS data suggest that such activity is not causally related  
369 to tactile performance. In this regard, the pattern of TMS results in S are consistent with those of  
370 individuals with late-onset blindness (Cohen et al., 1999) This prior work demonstrated that TMS  
371 of occipital cortex induced tactile deficits in both congenitally blind (Cohen et al., 1997) and early-  
372 blind individuals but not those whose blindness occurred after 14 years of age (Cohen et al.,  
373 1999), suggesting a critical time-frame in which functionally relevant reorganisation of visual  
374 cortex occurs. Although S's loss of visual function began at approximately six years of age, and  
375 thus within that timeframe, he nevertheless retains visual function. Indeed, S has a full visual field  
376 with no evidence of a central scotoma despite the very low-resolution ventral vision (Cheung et  
377 al., 2009). It is possible that this preserved peripheral visual function or his age when he lost vision  
378 has prevented the foveal representation in visual cortex taking on a causal role in tactile  
379 performance as is clearly the case in congenitally and early-onset blind individuals (Cohen et al.,  
380 1997, 1999; Sadato et al., 2002).

381

382 The finding that tactile responses in the foveal cortex of S play little to no causal role in S's tactile  
383 performance offer the possibility that such cortical resources remain capable of high-resolution  
384 visual analysis even in the absence of such an input from the retinogeniculate pathway (Cheung  
385 et al., 2009). It is possible therefore that S's foveal representation could revert back to processing  
386 high-resolution visual analysis if such retinogeniculate inputs could be restored (Fine et al., 2003)  
387 - although prior sight-restorations studies offer mixed encouragement for this possibility (Fine et  
388 al., 2003; Ostrovsky et al., 2006). Recent work in patients with macular degeneration (Masuda et  
389 al., 2021) highlight the presence of both somatosensory and auditory related activity within the  
390 LPZ during a one-back task, but not a passive condition. Such activity in the LPZ is considered to  
391 be mediated by task-related feedback signals, rather than feedforward visual input. The pattern

392 of fMRI results in S could be interpreted in a similar manner, in that tactile responses within the  
393 foveal representation could reflect task-related feedback from S1 (although distinguishing  
394 feedforward from feedback signals definitively with fMRI is challenging due to the sluggishness of  
395 the fMRI response). Nevertheless, it is possible that the reduced retinal input to foveal  
396 representations in both S and patients with macular degeneration leads to an unmasking of pre-  
397 existing connections between visual and other sensory cortices that are suppressed during  
398 normal vision (Cheung et al., 2009; Masuda et al., 2021). Only one form of tactile perception (i.e.  
399 Braille discrimination) was measured here, and although the pattern of rTMS results is striking, it  
400 is nevertheless possible that some other form of tactile function (e.g. texture perception, tactile  
401 acuity) might benefit from the tactile recruitment of foveal visual cortex.

402  
403 At first glance, it may appear surprising that TMS of OP during visual processing induced a much  
404 smaller decrement to performance in S than in controls. We believe however that this is accounted  
405 for by considering the size of the visual stimuli presented to S with respect to the foveal visual  
406 field representation of the targeted OP region. Placed in this context, it is not altogether surprising  
407 that rTMS of S's OP induced a weaker deficit than TMS of OP in controls. It is likely that were it  
408 possible to stimulate peripheral parts of V1 in S, a similar drop in performance would be observed  
409 to that of OP stimulation in controls during visual perception. Additionally, we considered whether  
410 differences in the accuracy of rTMS delivery could provide an alternative explanation for the  
411 pattern of results reported here in S, and the critical finding that TMS of OP does not impact tactile  
412 processing, in particular. To rule out this possibility, we analysed coil-displacement data acquired  
413 during each rTMS trial - an index of stimulation error. We found no evidence for significant  
414 variation in displacement as a function of either task or site. Thus, the lack of a detrimental impact  
415 on tactile processing following rTMS of OP in S cannot be attributed to poor precision during rTMS  
416 delivery.

417  
418 In summary, our study of S demonstrates that whilst foveal portions of visual cortex respond  
419 preferentially to tactile over visual stimulation, such activity does not causally influence tactile  
420 processing performance. Although prior work interpreted S's responses in the foveal  
421 representation as reflecting an optimal redistribution of cortical resources (Cheung et al., 2009),  
422 our data suggests this pattern likely reflects the unmasking of latent connections between visual  
423 and somatosensory cortex that are normally suppressed by the feedforward visual input provided  
424 to foveal cortex of normally sighted individuals (Masuda et al., 2021). We add weight to the view  
425 that cortical responses in individuals with visual deficits that differ from those obtained from  
426 controls are not always a signature of functional reorganisation.

427  
428  
429  
430  
431  
432  
433  
434  
435

436 **References**

- 437 1 Sadato, N. *et al.* (1996) Activation of the primary visual cortex by Braille reading in blind  
438 subjects. *Nature* 380, 526–528
- 439 2 Buchel, C. (1998) Different activation patterns in the visual cortex of late and congenitally  
440 blind subjects. *Brain* 121, 409–419
- 441 3 Cohen, L.G. *et al.* (1999) Period of susceptibility for cross-modal plasticity in the blind. *Ann.*  
442 *Neurol.* 45, 451–460
- 443 4 Burton, H. *et al.* (2002) Adaptive Changes in Early and Late Blind: A fMRI Study of Braille  
444 Reading. *J. Neurophysiol.* 87, 589–607
- 445 5 Sadato, N. *et al.* (2002) Critical Period for Cross-Modal Plasticity in Blind Humans: A  
446 Functional MRI Study. *NeuroImage* 16, 389–400
- 447 6 Cheung, S.-H. *et al.* (2009) Retinotopically Specific Reorganization of Visual Cortex for  
448 Tactile Pattern Recognition. *Curr. Biol.* 19, 596–601
- 449 7 Haak, K.V. *et al.* (2015) Plasticity, and Its Limits, in Adult Human Primary Visual Cortex.  
450 *Multisensory Res.* 28, 297–307
- 451 8 Baseler, H.A. *et al.* (2011) Large-scale remapping of visual cortex is absent in adult humans  
452 with macular degeneration. *Nat. Neurosci.* 14, 649–655
- 453 9 Merabet, L.B. *et al.* (2008) Rapid and Reversible Recruitment of Early Visual Cortex for  
454 Touch. *PLoS ONE* 3, e3046
- 455 10 Merabet, L.B. *et al.* (2007) Combined Activation and Deactivation of Visual Cortex During  
456 Tactile Sensory Processing. *J. Neurophysiol.* 97, 1633–1641
- 457 11 Kauffman, T. *et al.* (2002) Braille character discrimination in blindfolded human subjects.  
458 *NeuroReport* 13, 571–574
- 459 12 Masuda, Y. *et al.* (2021) V1 Projection Zone Signals in Human Macular Degeneration  
460 Depend on Task Despite Absence of Visual Stimulus. *Curr. Biol.* 31, 406-412.e3
- 461 13 Cohen, L.G. *et al.* (1997) Functional relevance of cross-modal plasticity in blind humans.  
462 *Nature* 389, 180–183
- 463 14 Wandell, B.A. *et al.* (2007) Visual Field Maps in Human Cortex. *Neuron* 56, 366–383
- 464 15 Silson, E.H. *et al.* (2013) Specialized and independent processing of orientation and shape  
465 in visual field maps LO1 and LO2. *Nat. Neurosci.* 16, 267–269
- 466 16 Strong, S.L. *et al.* (2017) A Direct Demonstration of Functional Differences between  
467 Subdivisions of Human V5/MT+. *Cereb. Cortex* 27, 1–10
- 468 17 Fine, I. *et al.* (2003) Long-term deprivation affects visual perception and cortex. *Nat.*  
469 *Neurosci.* 6, 915–916
- 470 18 Ostrovsky, Y. *et al.* (2006) Vision Following Extended Congenital Blindness. *Psychol. Sci.*  
471 17, 1009–1014
- 472 19 Cox, R.W. (1996) AFNI: Software for Analysis and Visualization of Functional Magnetic  
473 Resonance Neuroimages. *Comput. Biomed. Res.* 29, 162–173
- 474 20 Saad, Z.S. and Reynolds, R.C. (2012) SUMA. *NeuroImage* 62, 768–773

475  
476  
477  
478  
479  
480  
481  
482  
483  
484



485 **Supplemental Data**

486

487 **Table 1. Tactile and visual thresholds for S and controls**

488

| Participant | Tactile threshold delta<br>(amplitude units) | Visual threshold<br>(Background luminance / size dva) |
|-------------|----------------------------------------------|-------------------------------------------------------|
| <b>S</b>    | 440                                          | 0.000 / 15                                            |
| <b>C1</b>   | 762                                          | 0.988 / 4                                             |
| <b>C2</b>   | 731                                          | 0.985 / 4                                             |
| <b>C3</b>   | 411                                          | 0.986 / 4                                             |

489

490
